# Supplementary material for: Magnetic polymer bowl for enhanced catalytic activity and recyclability
Source: Royal Society of Chemistry journal article supplement (doi:10.1039/d1ra00453k), 2021-01-01
Supplement: d1ra00453k1.pdf [file d1ra00453k1.pdf]

## Supporting information

# Magnetic Polymer Bowl for Enhanced Reduction of Toxic Organic Dyes in Wastewater

### Determination of MPS grafting density on silica-coated magnetic clusters

For the silica-coated magnetic cluster seeds with a mass of  $m_{seed}$ , the grafting density of MPS on their surfaces ( $Q_{MPS}$ ,  $\mu\text{mol}/\text{m}^2$ ) is calculated as follows:

$$Q_{MPS} = (C_0 - C_e) \cdot V_{solution} \cdot \rho_{MPS} / (M_{MPS} \cdot m_{seed} \cdot S_{spec})$$

, where  $C_0$  (mL/mL) is the concentration of MPS initially fed for the grafting of MPS,  $C_e$  (mL/mL) is the concentration of MPS not grafted on the seeds, which is determined from the UV-Vis absorbance spectra at 210 nm using a calibration curve obtained from a series of known concentrations of MPS solutions in ethanol, and  $V_{solution}$  is the total volume of the solution.  $\rho_{MPS}$  and  $M_{MPS}$  are the density (1.045 g/mL) and molecular weight (248.35 g/mol) for MPS, respectively.

The specific surface area of the seeds ( $S_{spec}$ ) =  $4\pi R_{seed}^2 / \{\rho_{seed} \cdot (4/3)\pi R_{seed}^3\}$ , where  $R_{seed}$  is the radius of the seeds, which was measured from their TEM images, and the value is 200.5 nm.

The density of the seed ( $\rho_{seed}$ ) = (mass of  $\text{Fe}_3\text{O}_4$  cluster + mass of silica coating) / volume of seed =  $\{\rho_{mag} \cdot (4/3)\pi R_{mag}^3 + \rho_{silica} \cdot (4/3)\pi(R_{seed}^3 - R_{mag}^3)\} / \{(4/3)\pi R_{seed}^3\}$ , where  $R_{mag}$  is the radius of the magnetic cluster (~127 nm), which was measured from their TEM images.  $\rho_{silica}$  and  $\rho_{mag}$  are 2.2 and 5.1 g/cm<sup>3</sup>, respectively, which are the bulk densities for silica and  $\text{Fe}_3\text{O}_4$ .

### Calculation of the number of the AgNPs immobilized on a magnetic polymer particle

For the AgNP-immobilized, magnetic polymer particles with a mass of  $m_{Ag-polymer}$ , the mass of the polymer component encapsulated with the silica-coated magnetic seed ( $m_{polymer}$ ) is calculated as follows:

$$m_{polymer} = m_{Ag-polymer} - m_{Ag}$$

, where  $m_{Ag}$  is the mass of the AgNPs, which is obtained by ICP-MS characterization.

The number of the magnetic polymer particles ( $N_{polymer}$ ) =  $m_{polymer}$  / mass of one magnetic polymer particle =  $m_{polymer} / [\rho_{PS} \cdot \{V - (4/3)\pi R_{seed}^3\} + \rho_{seed} \cdot (4/3)\pi R_{seed}^3]$ , where  $V$  is the volume of one magnetic polymer particle and  $\rho_{PS}$  is the density of bulk PS (1.04 g/cm<sup>3</sup>).

The number of the immobilized AgNPs ( $N_{Ag}$ ) =  $m_{Ag}$  / mass of one AgNP =  $m_{Ag} / \{(4/3)\pi R_{Ag}^3 \cdot \rho_{Ag}\}$ , where  $R_{Ag}$  is the mean radius of the AgNPs (~3 nm) and  $\rho_{Ag}$  is 10.49 g/cm<sup>3</sup>.

The number of AgNPs immobilized on one polymer particle ( $X_{Ag}$ ) is determined by dividing  $N_{Ag}$  by  $N_{polymer}$ .

### **Calculation of turnover frequency (TOF) for AgNP-immobilized magnetic polymer particle**

Turnover frequency (TOF), which can quantify the specific activity of a catalytic system or center for a reaction under defined conditions, is calculated as follows:

$$\text{Turnover number (TON)} = \text{mol of transformed substrate} / \text{mol of catalytic center}$$

$$\text{TOF} = \text{TON} / \text{time}$$

Assuming that each magnetic polymer particle with immobilized AgNPs worked as each catalytic center, the number of the AgNP-immobilized magnetic polymer particles used for the 4-NP reaction was  $6.3 \times 10^7$ , which corresponds to  $1.04 \times 10^{-16}$  mol. Based on 90% conversion of the initial 4NP ( $4 \times 10^{-4}$  mol) at 25 °C, the TOF values for the magnetic polymer bowl, magnetic polymer flower, and magnetic polymer sphere were calculated to be  $3.01 \times 10^{11}$ ,  $1.61 \times 10^{11}$ , and  $9.11 \times 10^{10} \text{ min}^{-1}$ , respectively.

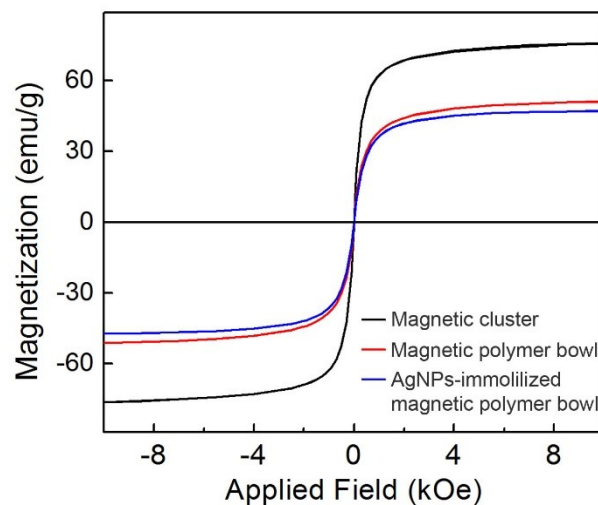

**Figure S1.** Field-dependent magnetization of magnetic clusters, magnetic polymer bowls, and AgNP-immobilized, magnetic polymer bowls.

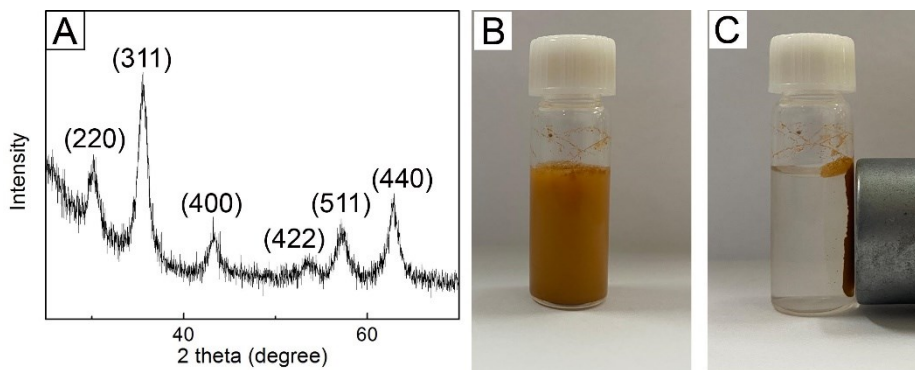

**Figure S2.** A) XRD pattern of the silica-coated  $\text{Fe}_3\text{O}_4$  magnetic clusters. B,C) Photographs of the silica-coated  $\text{Fe}_3\text{O}_4$  magnetic clusters dispersed in DI water: (B) without and (C) with application of a magnet.

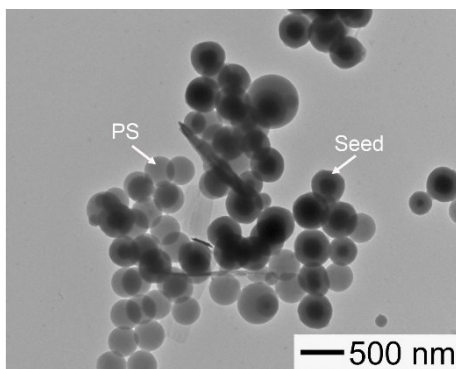

**Figure S3.** TEM image of the resultant sample after the polymerization at 70 °C for 6 h in the presence of silica-coated magnetic clusters.

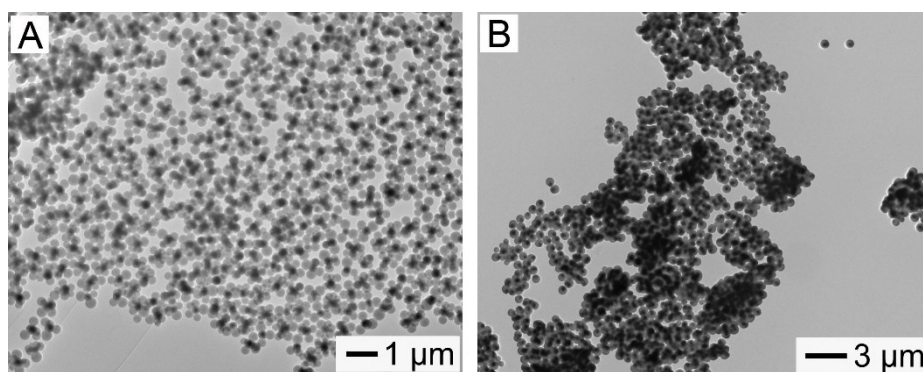

**Figure S4.** TEM images with low magnification for: A) flower-like particles and B) core-shell spheres.

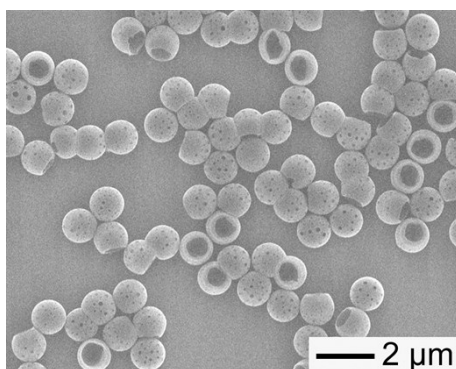

**Figure S5.** SEM image of the resultant sample after thermally treating the magnetic seed-encapsulated spheres at 70 °C for 2 h in the presence of decane, EHMA, and AIBN.

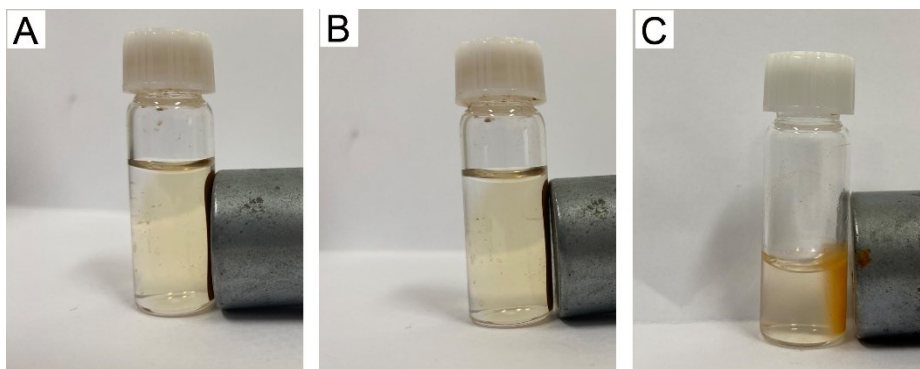

**Figure S6.** Photographs showing the magnetic response of each type of particles under application of magnet: A) flower-like particles, B) spherical particles, and C) bowl-like particles.

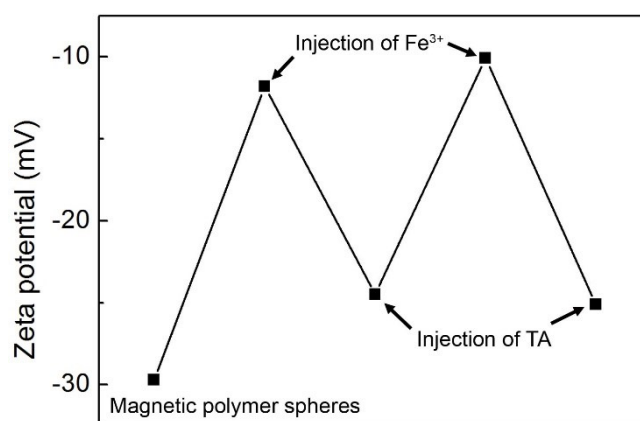

**Figure S7.** Zeta potential values for the magnetic polymer spheres after layer-by-layer deposition of  $\text{Fe}^{3+}$  and TA.

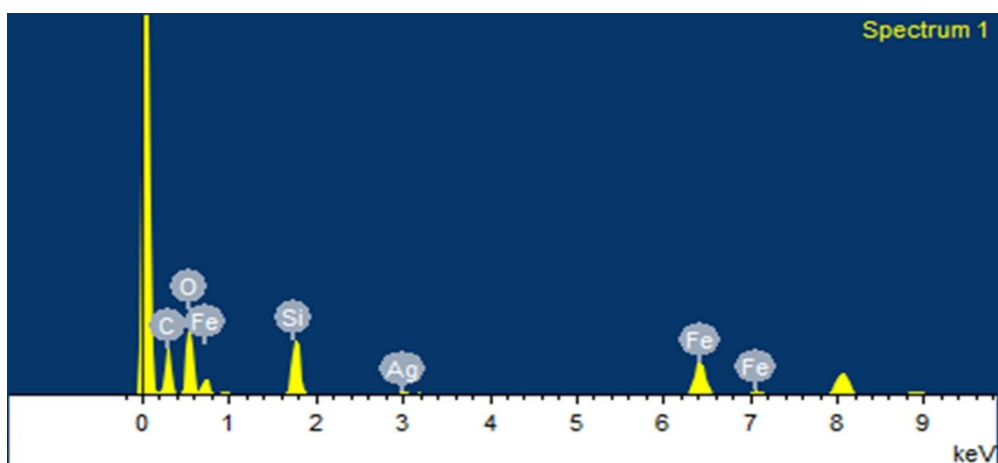

**Figure S8.** EDS spectrum for the magnetic polymer bowls with immobilized AgNPs.

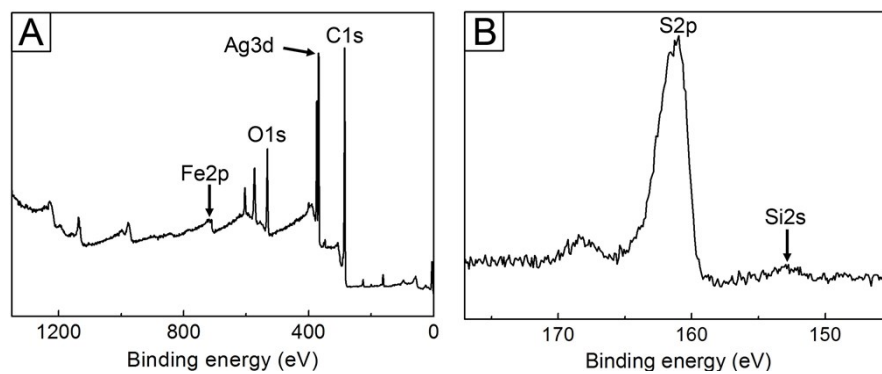

**Figure S9.** XPS spectra of the magnetic polymer bowls with immobilized AgNPs in the binding energy range: A) 0-1350 eV and B) 145-175 eV.

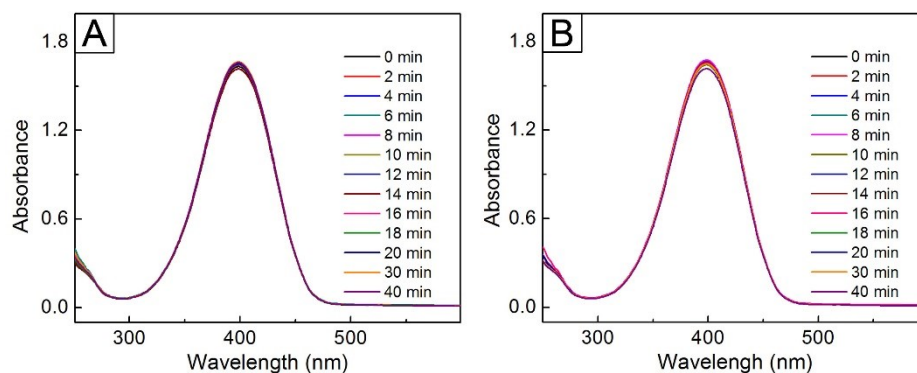

**Figure S10.** UV–Vis absorbance spectra at 25 °C for 4-NP as a function of time in the presence of: A) only  $\text{NaBH}_4$  and B) the magnetic polymer spheres without immobilized AgNPs together with  $\text{NaBH}_4$ .

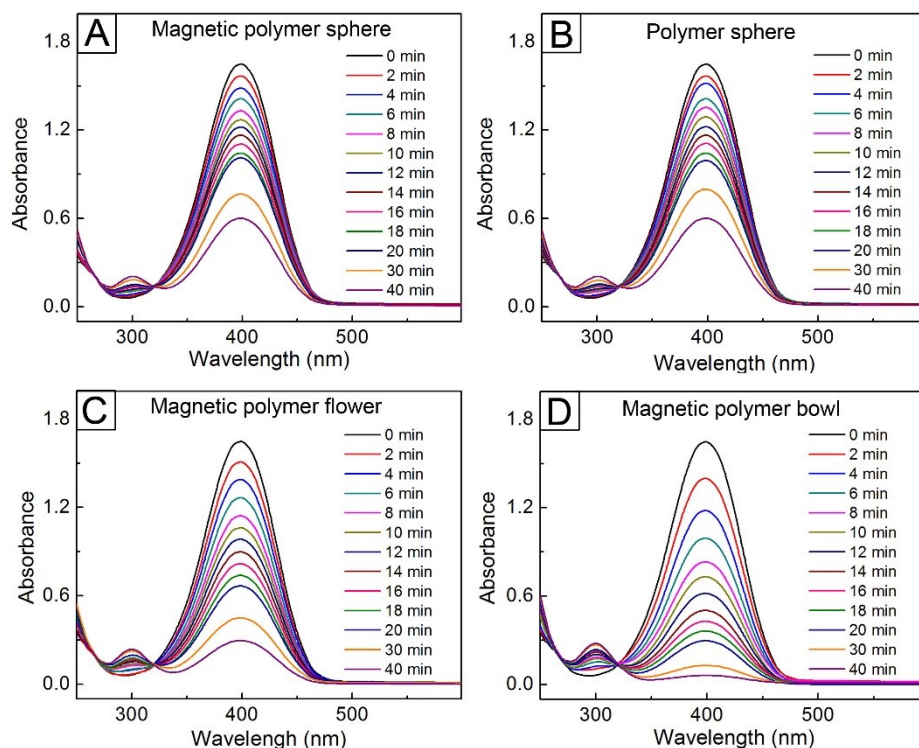

**Figure S11.** UV–vis absorbance spectra at 4 °C for 4-NP as a function of time under the use of various particles with immobilized AgNPs: A) magnetic polymer spheres, B) polymer spheres without the magnetic cluster seeds, C) magnetic polymer flowers, and D) magnetic polymer bowls.

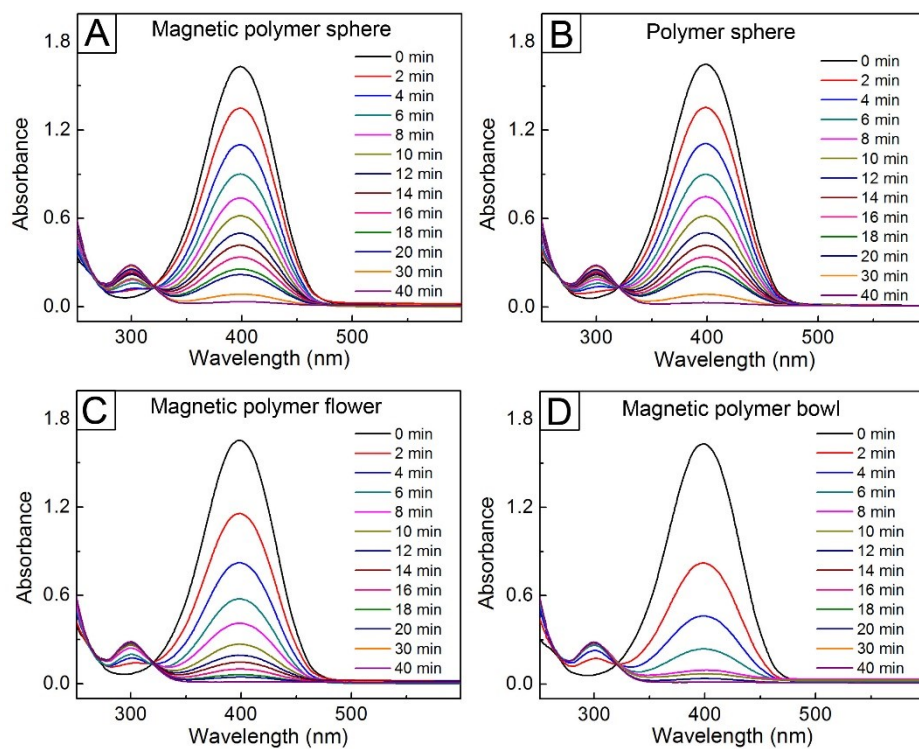

**Figure S12.** UV–vis absorbance spectra at 37 °C for 4-NP as a function of time under the use of various particles with immobilized AgNPs: A) magnetic polymer spheres, B) polymer spheres without the magnetic cluster seeds, C) magnetic polymer flowers, and D) magnetic polymer bowls.

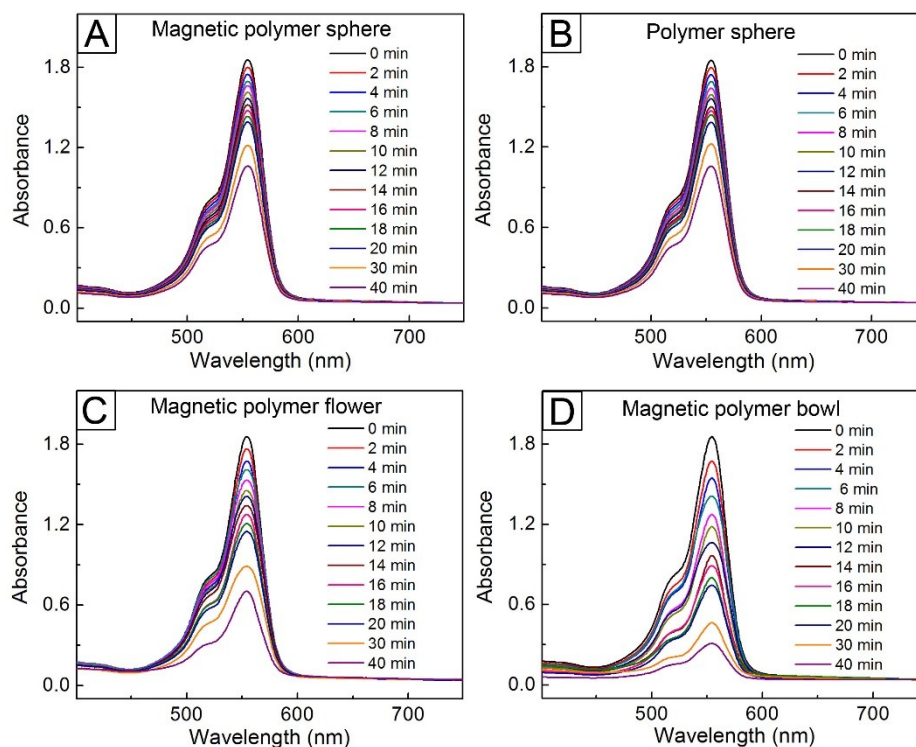

**Figure S13.** UV–vis absorbance spectra at 4 °C for rhodamine B as a function of time under the use of various particles with immobilized AgNPs: A) magnetic polymer spheres, B) polymer spheres without the magnetic cluster seeds, C) magnetic polymer flowers, and D) magnetic polymer bowls.

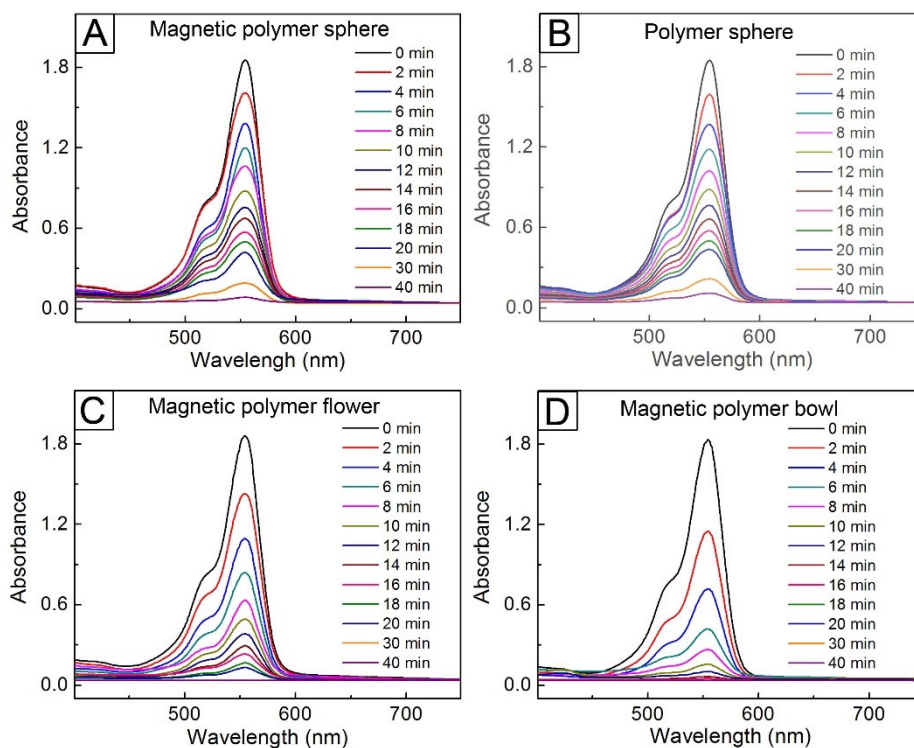

**Figure S14.** UV-vis absorbance spectra at 37 °C for rhodamine B as a function of time under the use of various particles with immobilized AgNPs: A) magnetic polymer spheres, B) polymer spheres without the magnetic cluster seeds, C) magnetic polymer flowers, and D) magnetic polymer bowls.

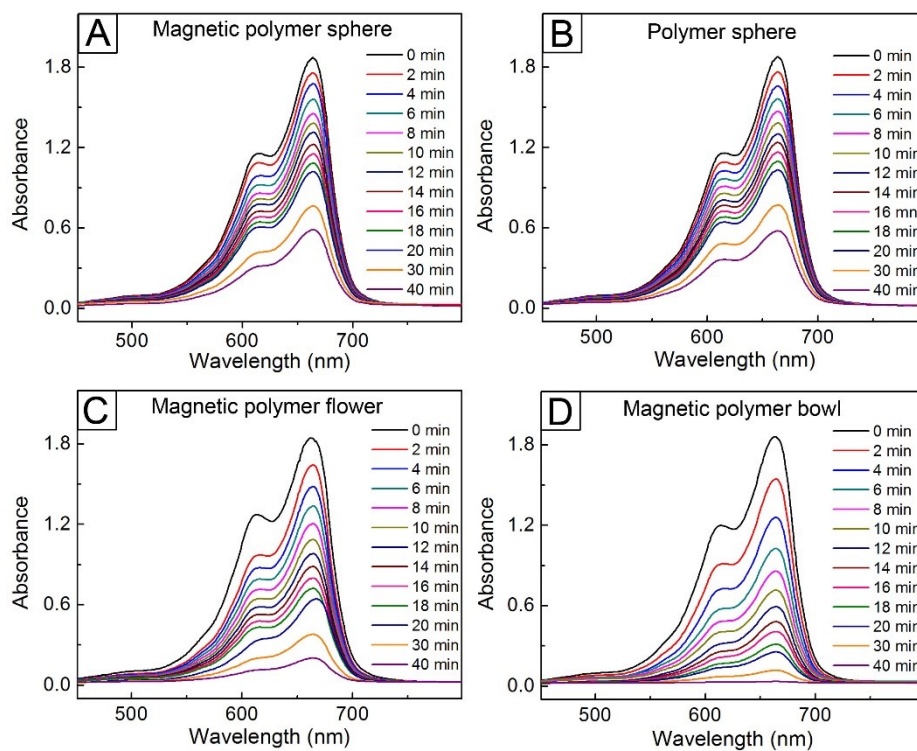

**Figure S15.** UV–vis absorbance spectra at 4 °C for MB as a function of time under the use of various particles with immobilized AgNPs: A) magnetic polymer spheres, B) polymer spheres without the magnetic cluster seeds, C) magnetic polymer flowers, and D) magnetic polymer bowls.

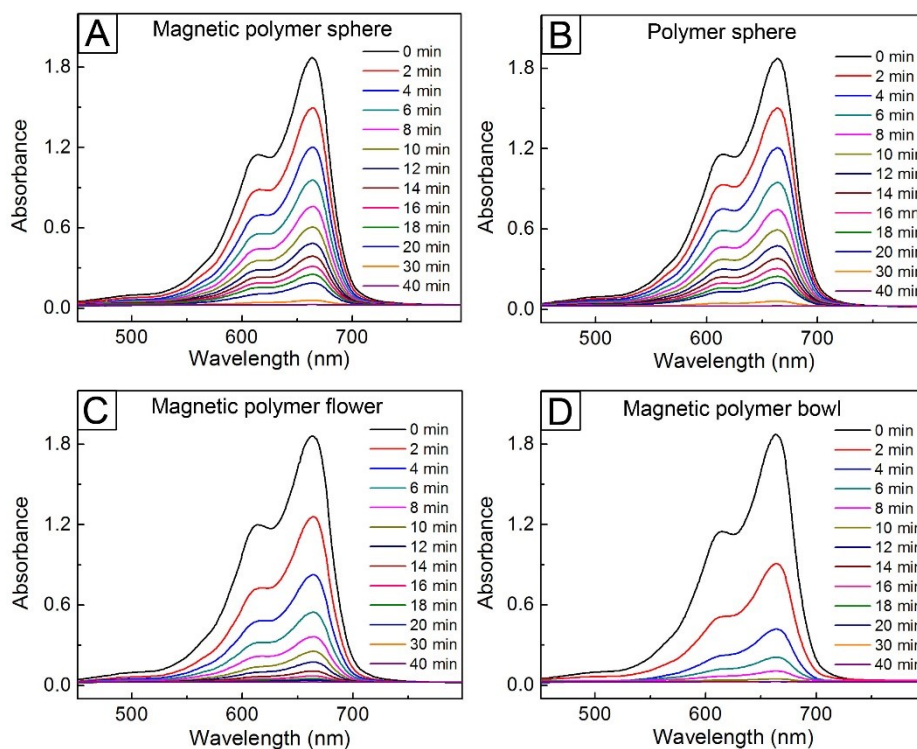

**Figure S16.** UV–vis absorbance spectra at 37 °C for MB as a function of time under the use of various particles with immobilized AgNPs: A) magnetic polymer spheres, B) polymer spheres without the magnetic cluster seeds, C) magnetic polymer flowers, and D) magnetic polymer bowls.

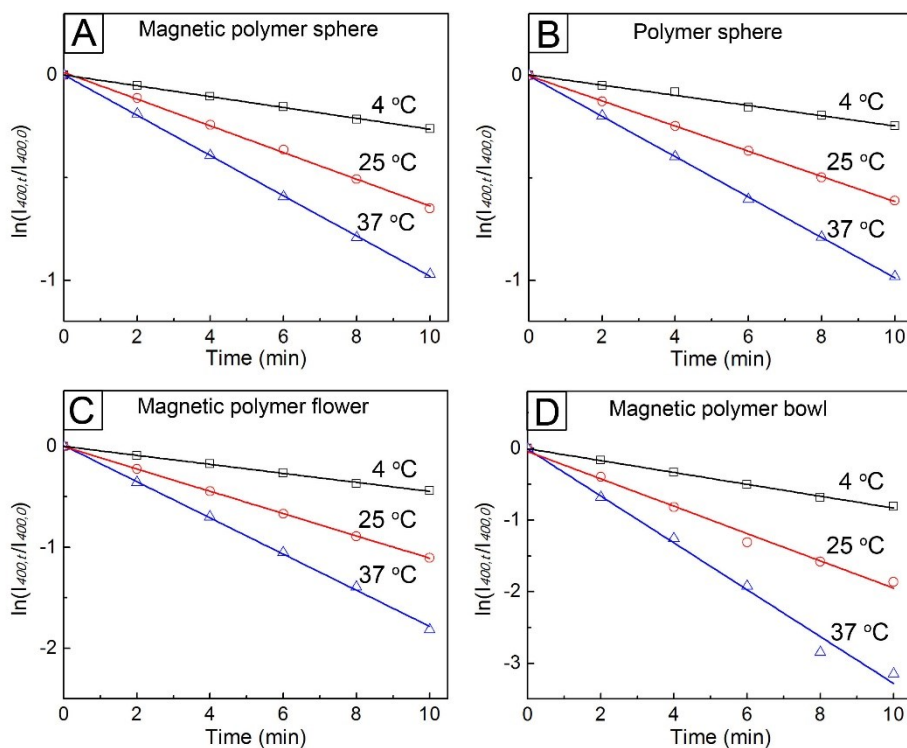

**Figure S17.** Plots of  $\ln(I_{400,t}/I_{400,0})$  for 4-NP as a function of time under the use of various particles with immobilized AgNPs: A) magnetic polymer spheres, B) polymer spheres without the magnetic cluster seeds, C) magnetic polymer flowers, and D) magnetic polymer bowls.

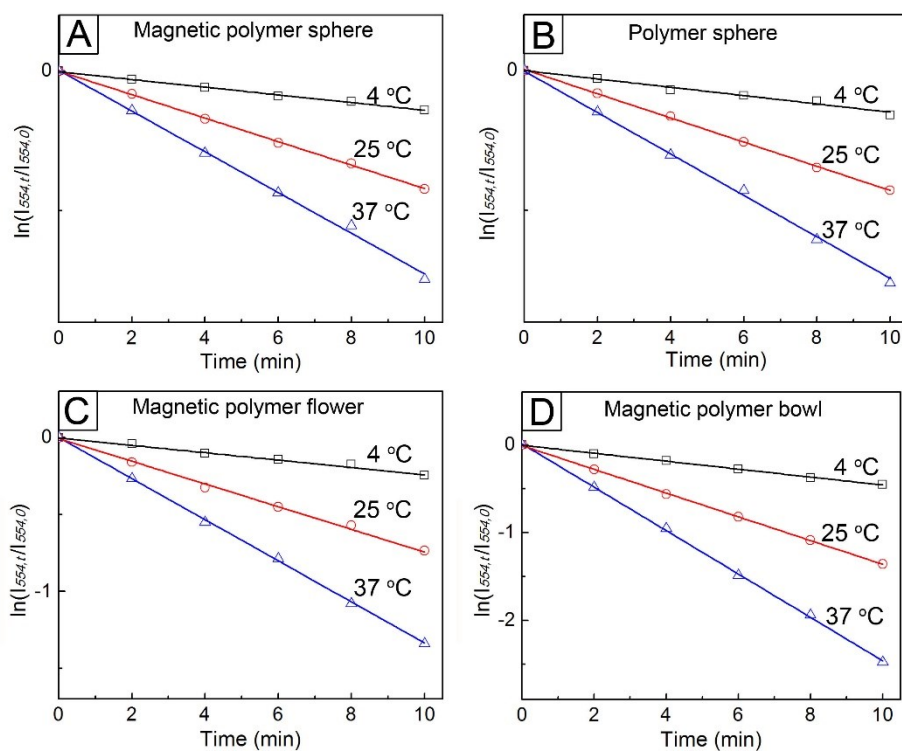

**Figure S18.** Plots of  $\ln(I_{554,t}/I_{554,0})$  for rhodamine B as a function of time under the use of various particles with immobilized AgNPs: A) magnetic polymer spheres, B) polymer spheres without the magnetic cluster seeds, C) magnetic polymer flowers, and D) magnetic polymer bowls.

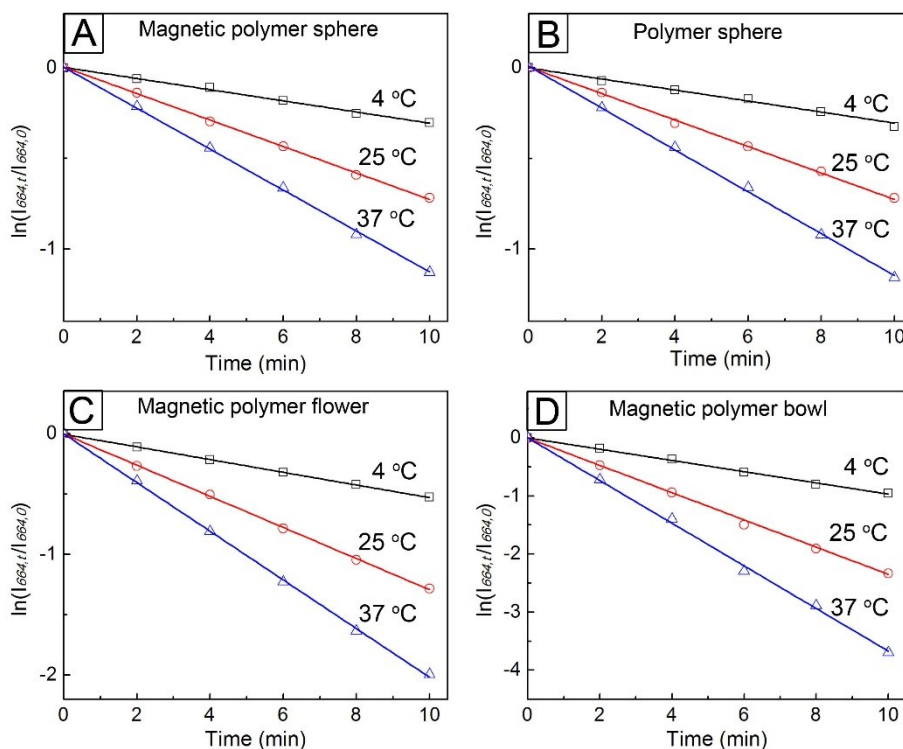

**Figure S19.** Plots of  $\ln(I_{664,t}/I_{664,0})$  for MB as a function of time under the use of various particles with immobilized AgNPs: A) magnetic polymer spheres, B) polymer spheres without the magnetic cluster seeds, C) magnetic polymer flowers, and D) magnetic polymer bowls.

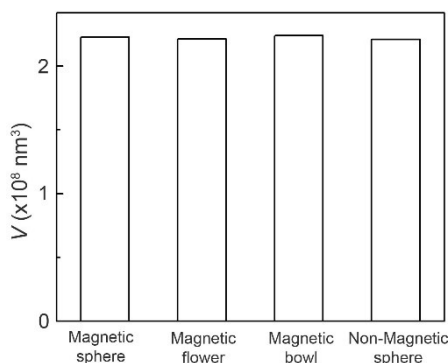

**Figure S20.** Volume ( $V$ ) of each type of magnetic polymer particle.

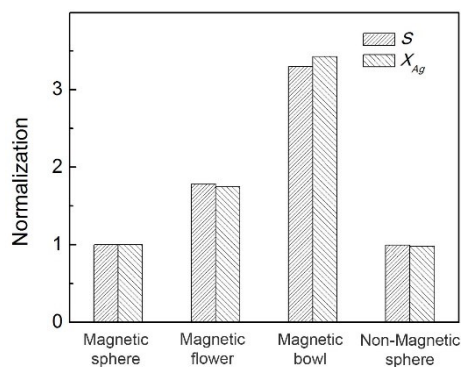

**Figure S21.** Normalized surface areas for the magnetic polymer particles with different structures and normalized numbers of immobilized AgNPs per magnetic polymer particle, which are obtained by dividing the surface area ( $S$ ) or number of immobilized AgNPs ( $X_{Ag}$ ) for each type of magnetic polymer particle by that of the nonmagnetic polymer sphere.
